# Supplementary material
Source: Springer Nature journal article supplement (https://www.springermedizin.de/resource/supplementary/12889_2014_7014_MOESM7_ESM.pdf/9499610)

Funnel plot with pseudo 95% confidence limits

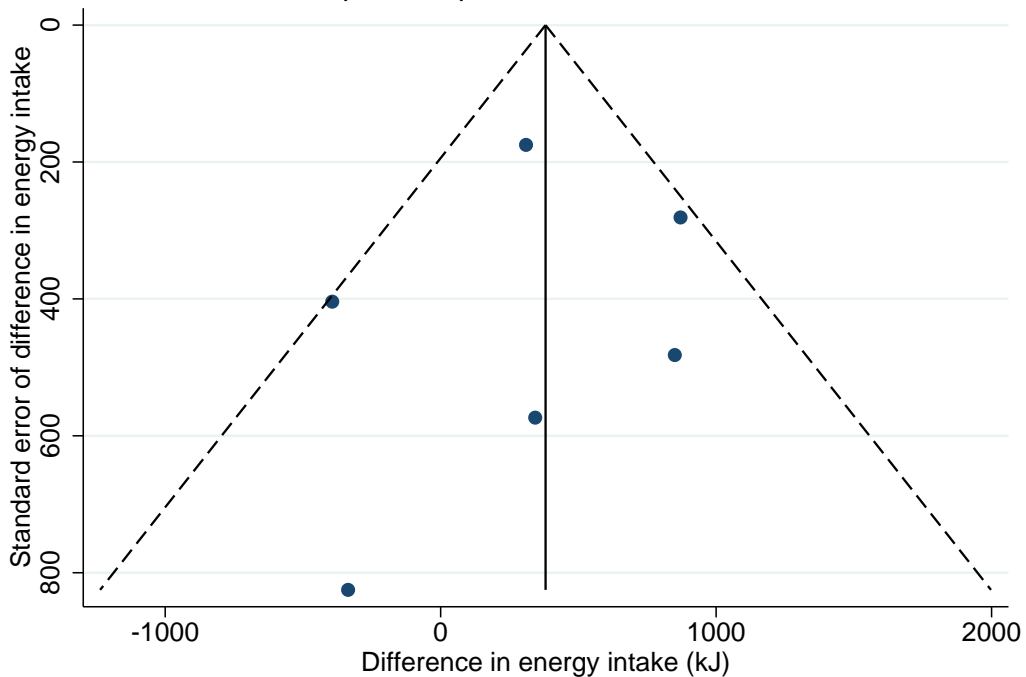

Supplement: MOESM7 [file 9499610]
